# Supplementary material for: Quantification of Circadian Rhythms in Single Cells
Source: PubMed Central journal article supplement (PMC2776301; doi:10.1371/journal.pcbi.1000580), 2009-11-26
Supplement: pcbi.1000580.s002.pdf [file pcbi.1000580.s002.pdf]

Table S1: **Statistics of data fits.** For each cell type, the percentage of successful fits, as well as the fraction of cells for which the damped and self-sustained model, respectively, was rejected with  $P < 0.05$ . The data is from the study of Liu et al. [5], except for (\*), which are the neurons from the study of Yamaguchi et al. [6].

| Cell type                             | Successful fits | Damped model rejected | Self-sustained model rejected |
|---------------------------------------|-----------------|-----------------------|-------------------------------|
| WT fibroblast                         | 100%            | 25%                   | 15%                           |
| <i>Cry1</i> <sup>-/-</sup> fibroblast | 80%             | 13%                   | 0%                            |
| <i>Cry2</i> <sup>-/-</sup> fibroblast | 100%            | 25%                   | 40%                           |
| <i>Per1</i> <sup>-/-</sup> fibroblast | 80%             | 0%                    | 13%                           |
| WT SCN neuron                         | 88%             | 9.0%                  | 2.1%                          |
| <i>Cry1</i> <sup>-/-</sup> SCN neuron | 53%             | 4.8%                  | 1.6%                          |
| <i>Cry2</i> <sup>-/-</sup> SCN neuron | 93.2%           | 0.66%                 | 7.9%                          |
| <i>Per1</i> <sup>-/-</sup> SCN neuron | 60%             | 6.7%                  | 2.7%                          |
| WT SCN neuron (*)                     | 100%            | 1.9%                  | 26%                           |
