# Supplementary material for: Quantification of Circadian Rhythms in Single Cells
Source: PLOS journal article supplement (doi:10.1371/journal.pcbi.1000580), 2009-11-26
Supplement: S3 (10.1371/journal.pcbi.1000580.s003) [file journal.pcbi.1000580.s003]

Table S2: **Heterogeneity of the cell populations.** Heterogeneity was quantified as the generalized standard deviation (GSD), i.e. the square root of the determinant of the covariance matrix of  $\lambda$ ,  $\omega$ , and the normalized amplitude for the damped model, and for  $\lambda$ ,  $\omega$ , the normalized amplitude, and amplitude CV ( $\sigma_r/A$ ) for the self-sustained model.

| Cell type                         | GSD, damped model | GSD, self-sustained model |
|-----------------------------------|-------------------|---------------------------|
| WT                                | 0.029             | 0.019                     |
| <i>Cry1</i> <sup>-/-</sup> mutant | 0.0091            | 0.0050                    |
| <i>Cry2</i> <sup>-/-</sup> mutant | 0.014             | 0.00041                   |
| <i>Per1</i> <sup>-/-</sup> mutant | 0.011             | 0.0098                    |
